# Supplementary material for: Potential Correlation between Changes in Serum FGF21 Levels and Lenvatinib-Induced Appetite Loss in Patients with Unresectable Hepatocellular Carcinoma
Source: MDPI journal article supplement (doi:10.3390/cancers15123257), 2023-06-20
Supplement: s1 [file s1]

### Supplementary Table S1

Multivariate logistic regression analysis of factors associated with grade 2 or more appetites loss during lenvatinib for unresectable hepatocellular carcinoma

|                    | Univariate analysis<br>(p value) | Multivariate analysis<br>(p value) | Odds ratio                 |
|--------------------|----------------------------------|------------------------------------|----------------------------|
| <b>Delta FGF21</b> | <b>0.009</b>                     | <b>0.037*</b>                      | <b>1.010 (1.001–1.020)</b> |
| TNM classification | 0.144                            | 0.889                              | 1.113 (0.987–1.255)        |
| Body mass index    | 0.136                            | 0.082                              | 1.067 (0.429–2.655)        |

Abbreviations: Delta FGF21, rate of changes in FGF21 between baseline and at 4 weeks after Lenvatinib;

HCC, hepatocellular carcinoma; \*Statistically significant difference,  $P < 0.05$
